# Supplementary material for: The Wheat GT Factor TaGT2L1D Negatively Regulates Drought Tolerance and Plant Development
Source: PubMed Central journal article supplement (PMC4887992; doi:10.1038/srep27042), 2016-06-01
Supplement: srep27042-s1.pdf [file srep27042-s1.pdf]

## **Title**

The Wheat GT factor *TaGT2L1D* Negatively Regulates Drought Tolerance and Plant Development

## **Authors and addresses**

Xin Zheng<sup>1,2</sup>, Haipei Liu<sup>3</sup>, Hongtao Ji<sup>4</sup>, Youning Wang<sup>4</sup>, Baodi Dong<sup>1</sup>, Yunzhou Qiao<sup>1</sup>, Mengyu Liu<sup>1\*</sup>, Xia Li<sup>4\*</sup>

<sup>1</sup>Center for Agricultural Resources Research, Institute of Genetics and Developmental Biology, Chinese Academy of Sciences, Shijiazhuang, Hebei 050021, P.R. China

<sup>2</sup>University of Chinese Academy of Sciences, Beijing 100049, P.R. China

<sup>3</sup>School of Agriculture, Food and Wine, University of Adelaide, Waite Research Institute, Glen Osmond, SA 5064, Australia

<sup>4</sup>State Key Laboratory of Agricultural Microbiology, College of Plant Science and Technology, Huazhong Agricultural University, Wuhan, 430070, P.R. China

## **\*Corresponding author**

Xia Li, Ph.D., Professor

State Key Laboratory of Agricultural Microbiology, College of Plant Science and Technology, Huazhong Agricultural University, Wuhan 430070, P.R. China

E-mail: xli@mail.hzau.edu.cn

Telephone number: 86-311-85871744

**\*Co-corresponding author:**

Mengyu Liu, Ph.D., Professor

Center for Agricultural Resources Research, Institute of Genetics and Developmental

Biology, Chinese Academy of Sciences, Shijiazhuang, Hebei 050021, P.R. China

E-mail: mengyuliu@sjziam.ac.cn

Telephone number: 86-311-85871562

**E-mail address of each author**

Xin Zheng: claudezx@gmail.com

Haipei Liu: haipei.liu@adelaide.edu.au

Hongtao Ji: htji@mail.hzau.edu.cn

Youning Wang: youningwang@mail.hzau.edu.cn

Baodi Dong: dongbaodi@126.com

Yunzhou Qiao: yunzhouqiao@hotmail.com

Mengyu Liu: mengyuliu@sjziam.ac.cn

Xia Li: xli@mail.hzau.edu.cn

## **Supplementary Information**

**Supplementary Table S1** The sequences of the primers and probes used in this study

**Supplementary Fig. S1** The nucleotide sequences of *TaGT2L1A*, *TaGT2L1B*, and *TaGT2L1D*

**Supplementary Fig. S2** Drought treatment suppressed the expression of *TaGT2L1A*, *TaGT2L1B*, and *TaGT2L1D*

**Supplementary Fig. S3** Expression levels of *TaGT2L1D* and *AtCCS52A1* in Col-0, *gtl1-3*, and *gtl1-3TaGT2L1D* lines

**Supplementary Fig. S4** Stomatal aperture in wild Col-0, *gtl1-3*, and *gtl1-3TaGT2L1D* lines

**Supplementary Fig. S5** Expression and purification of GST-TaGT2L1D-N and GST-TaGT2L1D-C proteins

**Supplementary Fig. S6** Expression level of *TaGT2L1D* in the *TaGT2L1DOE* lines

**Supplementary Table S1** The sequences of the primers and probes used in this study.

| Application                   | Name               | Sequence (5'-3')                                      |
|-------------------------------|--------------------|-------------------------------------------------------|
| Full-length CDS               | TaGT2L1-FL-F       | CCAACCACCTGTTGCACATACAGA                              |
|                               | TaGT2L1-FL-R       | GCATGGAACGGTGACTCGGTG                                 |
|                               | TaGT2L2-FL-F       | GCGACTGAGGAGGTGAGGG                                   |
|                               | TaGT2L2-FL-R       | CGACGATTTGGGCTTTCTT                                   |
|                               | TaGT2L3-FL-F       | GTGCACCCAGTGTGTACTA                                   |
|                               | TaGT2L3-FL-R       | GGTGGATCTACTGGACCAT                                   |
| Chromosomal locations         | TaGT2L1-chrA-F     | GCCATCACATCACACCATCGAT                                |
|                               | TaGT2L1-chrA-R     | AATTCTTGGCCTTAACACGAGG                                |
|                               | TaGT2L1-chrB-F     | TCCAGCGCATCGGTGGTC                                    |
|                               | TaGT2L1-chrB-R     | GCAGCTGGGATGGGTTGC                                    |
|                               | TaGT2L1-chrD-F     | AGTTCCAGAGGCCAAACCCG                                  |
|                               | TaGT2L1-chrD-R     | GGTGACTCGGTGATGGTGGGAATGA                             |
| qPCR                          | TaGT2L1A-q-F       | GCCATCACATCACACCATCGAT                                |
|                               | TaGT2L1A-q-R       | AATTCTTGGCCTTAACACGAGG                                |
|                               | TaGT2L1B-q-F       | TCCAGCGCATCGGTGGTC                                    |
|                               | TaGT2L1B-q-R       | GCAGCTGGGATGGGTTGC                                    |
|                               | TaGT2L1D-q-F       | AGTTCCAGAGGCCAAACCCG                                  |
|                               | TaGT2L1D-q-R       | GGTGACTCGGTGATGGTGGGAATGA                             |
|                               | TaACTIN-q-F        | CCTCTCTGCGCCAATCGT                                    |
|                               | TaACTIN-q-R        | TCAGCCGAGCGGGAAATTGT                                  |
|                               | AtSDD1-q-F         | GCCATTGGAACATTCCGAGC                                  |
|                               | AtSDD1-q-R         | CTGACCACAGCGGGAAATCT                                  |
|                               | AtCCS52A1-q-F      | CACGCTGCAAGAGAACAAGA                                  |
|                               | AtCCS52A1-q-R      | ACCACTTGAGTCCGCATACC                                  |
|                               | AtACTIN-q-F        | GTCTGGATTGGAGGGTC                                     |
|                               | AtACTIN-q-R        | TGAGAAATGGTCGGAAA                                     |
| RT-PCR                        | AtACTIN-RT-F       | GTCTGGATTGGAGGGTC                                     |
|                               | AtACTIN-RT-R       | TGAGAAATGGTCGGAAA                                     |
|                               | TaGT2L1D-RT-F      | AAGCAACGGGCAGACAAC                                    |
|                               | TaGT2L1D-RT-R      | CGTCAGTGTAGTCATCGCC                                   |
| Subcellular location          | TaGT2L1D-Xma1-F    | TCCCCCGGGATGCAGCAGCAGCATCAGCAC                        |
|                               | TaGT2L1D-Xma1-R    | TCCCCCGGGCTACTGAACCATGGCGAGGAAGG                      |
| BiFC assay                    | TaGT2L1D-gateway-F | GGGACAAGTTTGTACAAAAAAGCAGGCTTCA<br>TGCAGCAGCAGCATCAGC |
|                               | TaGT2L1D-gateway-R | GGGACCACCTTTGTACAAGAAAGCTGGGTCCT<br>GAACCATGGCGAGGAAG |
| Transgenic <i>Arabidopsis</i> | TaGT2L1D-EcoR1-F   | CCGGAATTCATGCAGCAGCAGCATCAGCAC                        |
|                               | TaGT2L1D-Xba1-R    | CTAGTCTAGACTACTGAACCATGGCGAGGAAGG                     |

|                                   |                             |                                                         |
|-----------------------------------|-----------------------------|---------------------------------------------------------|
| EMSA                              | TaGT2L1D-N-EcoR1-F          | CCGGAATTCATGCAGCAGCAGCATCAGCAC                          |
|                                   | TaGT2L1D-N-Sal1-R           | ACGCGTCGACCTAGAAGAAGCGGTAGCTCTTG<br>CC                  |
|                                   | TaGT2L1D-C-EcoR1-F          | CCGGAATTCGTCGCCACGGAGCAGCACG                            |
|                                   | TaGT2L1D-C-Sal1-R           | ACGCGTCGACCTACTGAACCATGGCGAGGAAG<br>G                   |
|                                   | SDD1-GT3box-F-probe         | TTCTTTGGCTTGGTAAAACTTCAATGGA                            |
|                                   | SDD1-GT3box-R-probe         | TCCATTGAAGTTTTACCAAGCCAAAGAA                            |
| <i>Trans</i> -repression<br>assay | TaGT2L1D-pYF503-<br>EcoR1-F | CCGGAATTCATGCAGCAGCAGCATCAGC                            |
|                                   | TaGT2L1D-pYF503-<br>Sal1-R  | ACGCGTCGACCTACTGAACCATGGCGAGGA                          |
|                                   | GAL4-TaGT2L1D-F             | GGGGACAAGTTTGTACAAAAAAGCAGGCTATG<br>AAGCTACTGTCTTCTATCG |
|                                   | GAL4-TaGT2L1D-R             | GGGGACCACTTTGTACAAGAAAGCTGGGTCTA<br>CTGAACCATGGCGAGGA   |
|                                   | proSDD1-Pst1-F              | AAAACCTGCAGCGAACGGGAAGCGGAAAG                           |
|                                   | proSDD1-BamH1-R             | CGCGGATCCTGGAGAGAGTTAAAAAAGGAGT<br>TG                   |

TaGT2L1A -----ATGCAGCAGCACCAGCACCAGGGTGACGCGTCTCAGTACGGGGCGCCGCCG  
TaGT2L1B ATGCAGCAGCAGCATCAGCACCACCAGGGTGGCGGGTCTCAGTACGGGGC---GCCG  
TaGT2L1D ATGCAGCAGCAGCATCAGCACCACCAGGGTGGCGGGTCTCAGTACGGGGC---GCCG  
\*\*\* \*\*\*\*\* \*\*\*\*\* \*\* \*\*\*\*\*

TaGT2L1A CAGCCGGCGGACATGGGGCCGTTCTCCGCGCAGCAGGCTCCGGCCCCTGTGCCGTGAGC  
TaGT2L1B CCGCCGGCGGACATGGGGCCGTTCTCCGCGCAGCCGGCTCCGGGCCCGGTGCCGTGAGC  
TaGT2L1D CCGCCGGCGGACATGGGGCCGTTCTCCGCGCAGCCGGCTCCGGGCCCGGTGCCGTGAGC  
\* \*\*\*\*\* \*\*\*\*\*

TaGT2L1A GTCCGGCCACCGCCGACCAGCACCAGCAGCAGCAGAACCCGCAGCCGAGCTACGACGAA  
TaGT2L1B GTCCGGCCACCGCCGACGCAGCAGCAGCAGCCA-----CAGCCGAGCTACGAACAGGAA  
TaGT2L1D GTCCGGCCACCGCCGACGCAGCAGCAGCAGCCA-----CAGCCGAGCTACGAACAGGAA  
\*\*\*\*\* \*\*\*\*\* \* \* \* \* \*

TaGT2L1A TTGGCCGGCGCGTCGGGCGCCGGCCAGCGGCTTCCCCGACGACGACATGCTGGGCGAC  
TaGT2L1B TTGGCCGGCGCGTCGGGCGCCGGCGGAAGCAGCTTCCCCGACGACGACATGCTGGGCGAC  
TaGT2L1D TTGGCCGGCGCGTCGGGCGCCGGCGGAAGCAGCTTCCCCGACGACGACATGCTGGGCGAC  
\*\*\*\*\* \*\*\*\*\*

TaGT2L1A TCCGGCGGGCACAGCGCGCGGGCTGGGGTCGGGCGGCAACCGGTGGCCGCGGGAGGAG  
TaGT2L1B TCCGGCGGGCACAGCGCGCGGGCTGGGGTCGGGCGGCAACCGGTGGCCGCGGGAGGAG  
TaGT2L1D TCCGGCGGGCACAGCGCGCGGGCTGGGGTCGGGCGGCAACCGGTGGCCGCGGGAGGAG  
\*\*\*\*\* \*\*\*\*\*

TaGT2L1A ACGCTGGCCCTCATCAGGATCCGGTCGGAGATGGACACCACCTTCCGCGACGCCACCCTC  
TaGT2L1B ACGCTGGCCCTCATCAGGATCCGGTCGGAGATGGACACCACCTTCCGCGACGCCACCCTC  
TaGT2L1D ACGCTGGCCCTCATCAGGATCCGGTCGGAGATGGACACCACCTTCCGCGACGCCACCCTC  
\*\*\*\*\*

TaGT2L1A AAGGTCCCCCTCTGGGAGGAGTCTCCAGGAAGCTTGCAGGAGCTGGGCTACAAGAGGAGC  
TaGT2L1B AAGGGCCCCCTCTGGGAGGAGTCTCCAGGAAGCTTGCAGGAGCTGGGCTACAAGAGGAGC  
TaGT2L1D AAGGGCCCCCTCTGGGAGGAGTCTCCAGGAAGCTTGCAGGAGCTGGGCTACAAGAGGAGC  
\*\*\* \*\*\*\*\*

TaGT2L1A GCCAAGAAGTGCAAGGAGAAGTTCGAGAACGTGCACAAGTACTACAAGCGACCAAGGAG  
TaGT2L1B GCCAAGAAGTGCAAGGAGAAGTTCGAGAACGTGCACAAGTACTACAAGCGACCAAGGAG  
TaGT2L1D GCCAAGAAGTGCAAGGAGAAGTTCGAGAACGTGCACAAGTACTACAAGCGACCAAGGAG  
\*\*\*\*\*

TaGT2L1A GGCCGCGCCGGCCGGCAGGACGGCAAGAGCTACCGCTTCTTCCAGGAGCTCGAGGCACTG  
TaGT2L1B GGCCGGCCGGCCGGCAGGACGGCAAGAGCTACCGCTTCTTCCAGGAGCTCGAGGCGCTG  
TaGT2L1D GGCCGGCCGGCCGGCAGGACGGCAAGAGCTACCGCTTCTTCCAGGAACCTCGAGGCGCTG

\*\*\*\*\*

TaGT2L1A CACGCCGCCACCGCCGCGCAGCACCACCAGCAGCACCAGGAGCAGTTGCCTCTCGTC  
TaGT2L1B CACGCCGCCACCGCAGCCGCGCAGCACCAG-----CAGCAGGAGCACTTGCCGCTGGTC  
TaGT2L1D CACGCCGCCACCGCCGCGCAGCAGCAG-----CAGCAGGACCACTTGCCGCTGGTC  
\*\*\*\*\*

TaGT2L1A GTCAGTGCCGCCCCCGCCGAGATGCACGCCTTCTCCGCGCCGAGCCGATGAGCGCA  
TaGT2L1B GTCAGTGAGCCCCCGCCGAGATGCACGCCTTCTCCGCGCCCAGCCGATGAGCGCA  
TaGT2L1D GTCAGTGCCGCCCCCGCCGAGATGCACGCCTTCTCCGCGCCGAGCCGATGAGCGCA  
\*\*\*\*\*

TaGT2L1A ATGCCGCCGCCCGGGGCGGATGCAGCCGCCCTATATCTTCGGCGGCCCTGCGCCG  
TaGT2L1B ATGCCGCCGCCCGGGGCGGATGCAGCCGCCCTATATCTTCGGCGGCCCTGCGCCG  
TaGT2L1D ATGCCGCCGCCCGGGGCGGATGCAGCCGCCCTATATCTTCGGCGGCCCTGCGCCG  
\*\*\*\*\*

TaGT2L1A GCCGTGGAGCCTCCCCAGCCGCCCTGTCAGCCTGCAAGGCTGAGCTTCCCGTGCATG  
TaGT2L1B GTCGTGGAGCCTCCCCATCCGCTGCCTGTCAGCCTGCAAGGCTCAGCTTCCCGTCCATG  
TaGT2L1D GCCGTGGAGCCTCCCCAGCCGCCCTGTCAGCCTGCAAGGCTTGAGCTTCCCGTCCATG  
\* \*\*\*\*\*

TaGT2L1A TCCGACTCCGAGTCGGATGACGACGACGACTCCGAGGACGACGACATGACGGCCGAGACC  
TaGT2L1B TCCGACTCTGAGTCGGACGACGACGACGACTCCGAGGATGACGACATGACGGCCGAGACA  
TaGT2L1D TCCGACTCTGAGTCGGACGACGACGACGACTCCGAGGACGACGACATGACGGCCGAGACC  
\*\*\*\*\*

TaGT2L1A GGCGGCAGCCCGACGGCCTCGGCAAGCGAAAGCGTGCGGCGGGGGTAGCAAAAAGATG  
TaGT2L1B GGCGGCAGCCCGATGGCCTCGGCAAGCGAAGCGGCGGGCGGCGGCAGCAAGAAGATG  
TaGT2L1D GGCGGCAGCCCGATGGCCTCGGCAAGCGAAGCGGCGGGCGGCGGCAGCAAGAAGATG  
\*\*\*\*\*

TaGT2L1A ATGGCTTCTTCGAGGGCCTGATGAAGCAGGTCGTACAGAGGCAGGAGGAGATGCAGCAG  
TaGT2L1B ATGGCTTCTTCGAGGGCCTGATGAAGCAGGTCGTACAGAGGCAGGAGGAGATGCAGCAG  
TaGT2L1D ATGGCTTCTTCGAGGGCCTGATGAAGCAGGTCGTACAGAGGCAGGAGGAGATGCAGCAG  
\*\*\*\*\*

TaGT2L1A CGGTTCTTGAGACCATGGAGAAGAGGGAGGCCGAGCGCACGGCGGGAGGAGGCCTGG  
TaGT2L1B CGGTTCTTGAGACCATGGAGAAGAGGGAGGCCGAGCGCACGGAGCGGGAGGAGGCCTGG  
TaGT2L1D CGGTTCTTGAGACCATGGAGAAGAGGGAGGCCGAGCGCACGGCGGGAGGAGGCCTGG  
\*\*\*\*\*

TaGT2L1A CGCCGGCAGGAGGTGGCCCGCTTAACCGTGAGCAGGAGCAGCTCGCCCAAGAGCGCGCC  
TaGT2L1B CGCCGGCAGGAGGTGGCCCGCTTAACCGCGAGCAGGAGCAGCTCGCGCAGGAGCGCGCC





TaGT2L1B CGCTACCAGGAGAACGGACCAAAGGGCCCGCTGTGGGAGGAGATCTCCGCCGGGATGCGG  
 TaGT2L1D CGCTACCAGGAGAACGGACCAAAGGGCCCGCTGTGGGAGGAGATCTCCGCCGGGATGCGG  
 \*\*\*\*\*

TaGT2L1A CGGCTGGGTTACAGCCGCAACTCCAAACGGTGCAAGGAGAAGTGGGAGAACATCAACAAG  
 TaGT2L1B CGGCTGGGTTACAGCCGCAACTCCAAACGGTGCAAGGAGAAGTGGGAGAACATCAACAAG  
 TaGT2L1D CGGCTGGGTTACAGCCGCAACTCCAAACGGTGCAAGGAGAAGTGGGAGAACATCAACAAG  
 \*\*\*\*\*

TaGT2L1A TACTTCAAGAAGGTGAAGGAGAGCAACAAGAGGCGGCCGGAGGACTCCAAGACATGCCCC  
 TaGT2L1B TACTTCAAGAAGGTGAAGGAGAGCAACAAGAGGCGGCCGGAGGACTCCAAGACATGCCCC  
 TaGT2L1D TACTTCAAGAAGGTGAAGGAGAGCAACAAGAGGCGGCCGGAGGACTCCAAGACATGCCCC  
 \*\*\*\*\*

TaGT2L1A TACTTCCACCAGCTCGAGGCCATCTACCGCAAGAAGCACAACGGCGGGCAGCAGCGGC  
 TaGT2L1B TACTTCCACCAGCTCGAGGCCATCTACCGCAAGAAGCACAACGGCAGCGGCAGCAGCGGC  
 TaGT2L1D TACTTCCACCAGCTCGAGGCCATCTACCGCAAGAAGCACAACGGCGGGCAGCAGCGGC  
 \*\*\*\*\*

TaGT2L1A GCCGCGCCAACAACGCCGTCGTGCCTGTCCCTGCCGTGCGGAGCATCAGAACCTGAAC  
 TaGT2L1B GCCGCGCCAACAACGCCGTCGTGTCTGTCCCTGCCGTGCGGAGCATCAGAACCTGAAC  
 TaGT2L1D GCCGCGCCAACAACGCCGTCGTGTCTGTCCCTGCCGTGCGGAGCATCAGAACCTGAAC  
 \*\*\*\*\*

TaGT2L1A CGGCACGAGATCGAGATCGAGGGGAAGAAGATCAACGACACCGACAAGAGGAACAACGGA  
 TaGT2L1B CGGCACGAGATCGAGATCGAGGGGAAGAAGATCAACGACACCGACAAGAGGAACAACGGA  
 TaGT2L1D CGGCACGAGATCGAGATCGAGGGGAAGAAGATCAACGACACCGACAAGAGGAACAACGGA  
 \*\*\*\*\*

TaGT2L1A GGAGTCGGAGCCGCGCAGGTACCGACAAGCAACGGGCAGACAACGCCGCCGACGGCCACG  
 TaGT2L1B GGAGTCGGAGCCGCGCAGGTGCCGACAAGCAACGGGCAGACAACGCCGCCGACGGCCACG  
 TaGT2L1D GGAGTCGGAGCCGCGCAGGTGCCGACAAGCAACGGGCAGACAACGCCGCCGATGGCCACG  
 \*\*\*\*\*

TaGT2L1A TTCGACCTGGGTGTAAAAAAGCCAGAAGACGCTGTGAGGGAGCTGAACGAGCAGCCGCAC  
 TaGT2L1B TTCGACCTGGGCGTAAAAAAGCCAGAAGACGCTGTGAGGGAGCTGAACGAGCAGCCGCAC  
 TaGT2L1D TTCGACCTGGGCGTAAAAAAGCCAGAAGACGCTGTGAGGGAGCTGAACGAGCAGCCGCAC  
 \*\*\*\*\*

TaGT2L1A CGGGAGTTCACGACGGACGAGACCGACAGCGACGACATGGGCGATGACTTACTGACGAC  
 TaGT2L1B CGGGAGTTCACGACGGACGAGACCGACAGCGACGACATGGGCGATGACTTACTGACGAC  
 TaGT2L1D CGGGAGTTCACGACGGACGAGACCGACAGCGACGACATGGGCGATGACTTACTGACGAC  
 \*\*\*\*\*

```

TaGT2L1A      GGCAGGACGGCGAGGACGACGGCAAAATGCAGTACAGGATACAGTTCCAGAGGCCAAAC
TaGT2L1B      GGCAGGACGGCGAGGACGACGGCAAAATGCAGTACAGGATACAGTTCCAGAGGCCAAAC
TaGT2L1D      GGCAGGACGGCGAGGACGACGGCAAAATGCAGTACAGGATACAGTTCCAGAGGCCAAAC
                *****

TaGT2L1A      CCCGTCGGCACCAACAATGCGCCTCCATCACCACCACCGCGGCGACAGCGGCGCCGACA
TaGT2L1B      CCCGTCGGCACCAACAATGCGCCTCCACCGCCAACCACCGCGGCGACAGCAGCGCCGACA
TaGT2L1D      CCGGTCGGCACCAACAATGCGCCTCCACCGCCAACCACCGCGGCGACAGCAGCGCCGACA
                ** ***** * ***** *****

TaGT2L1A      TCGACCCCGCGAGCTCCTTTCTCGCCATGGTTCAG
TaGT2L1B      TCGACCCCGCGAGCTCCTTCCTCGCCATGGTTCAA
TaGT2L1D      TCGACCCCGCGAGCTCCTTCCTCGCCATGGTTCAG
                *****

```

**Supplementary Fig. S1** The nucleotide sequences of *TaGT2L1A*, *TaGT2L1B*, and *TaGT2L1D*. Sequences alignments were performed using Clustal Omega 1.2.1. The asterisks indicate the consensus sequences.

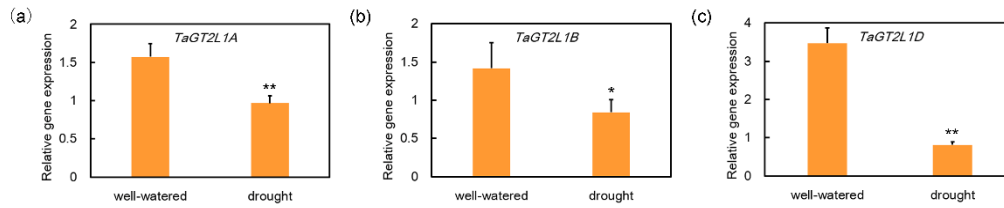

**Supplementary Fig. S2** Drought treatment suppressed the expression of *TaGT2L1A*, *TaGT2L1B*, and *TaGT2L1D*. One-week-old wheat seedlings were cultured with (well-watered) or without (drought) watering for three weeks, and then total RNA was isolated from leaf samples and reverse-transcribed ( $n = 6$ ). The qPCR was performed to determine the expression of *TaGT2L1A* (a), *TaGT2L1B* (b), and *TaGT2L1D* (c) using *TaACTIN* gene as an internal reference. All values are the means  $\pm$  standard deviations of three independent experiments. Asterisks represent statistically significant differences compared with well-watered group (Student's *t*-test, \* $P < 0.05$ , \*\* $P < 0.01$ ).

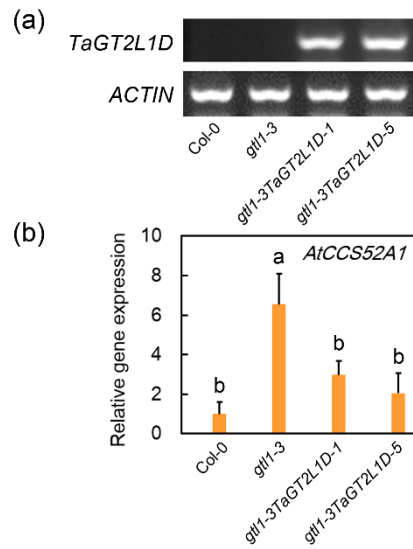

**Supplementary Fig. S3** Expression levels of *TaGT2L1D* and *AtCCS52A1* in Col-0, *gtl1-3*, and *gtl1-3 TaGT2L1D* lines. Total RNA from six-week-old Col-0, *gtl1-3*, *gtl1-3TaGT2L1D-1*, and *gtl1-3TaGT2L1D-5* plants was isolated and reverse-transcribed (n = 6). Gene-specific primers were used to examine the expression of *TaGT2L1D* (a) and *AtCCS52A1* (b). RT-PCR and qPCR were performed using *AtACTIN* as an internal reference. All values are the means  $\pm$  standard deviations of three independent experiments. Different letters indicate a significant differences (Student-Newman-Keuls test,  $P < 0.05$ ).

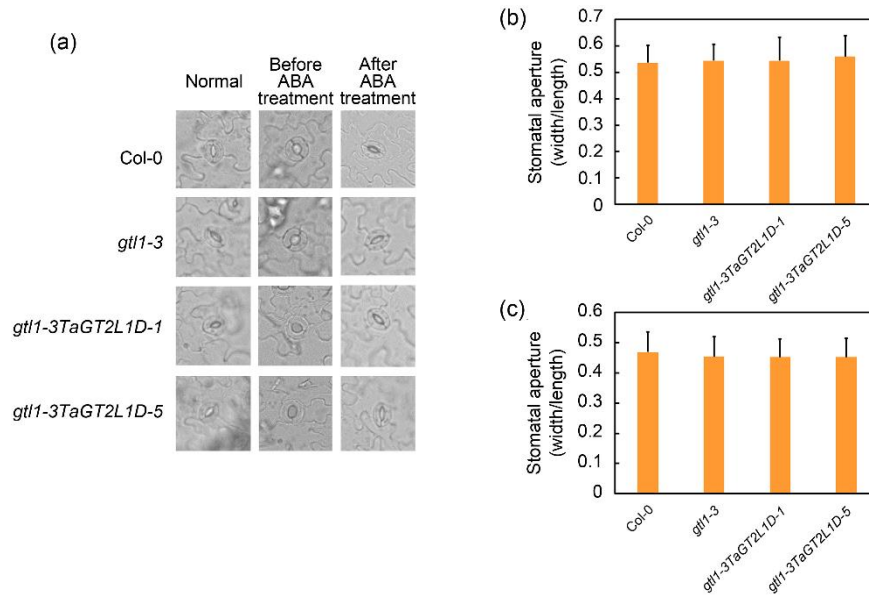

**Supplementary Fig. S4** Stomatal aperture in wild-type Col-0, *gtl1-3*, and *gtl1-3TaGT2L1D* lines under normal condition or ABA treatment. **(a)** Stomatal apertures in Col-0, *gtl1-3*, *gtl1-3TaGT2L1D-1*, and *gtl1-3TaGT2L1D-5* plants under normal condition or after 20  $\mu$ M ABA treatment for 1 h. “Normal” indicates stomatal apertures in normal condition; “Before ABA treatment” indicates stomatal apertures after 2 h incubation in a buffer solution (20 mM KCl, 5 mM MES-KOH, and 1 mM CaCl<sub>2</sub>, pH 6.15); “After ABA treatment” indicates stomatal apertures after 1 h 20  $\mu$ M ABA incubation. Representative micrographs are shown. **(b)** Stomatal apertures of Col-0, *gtl1-3*, *gtl1-3TaGT2L1D-1*, and *gtl1-3TaGT2L1D-5* plants corresponding to “Normal” group in **(a)**. **(c)** Stomatal apertures of Col-0, *gtl1-3*, *gtl1-3TaGT2L1D-1*, and *gtl1-3TaGT2L1D-5* plants corresponding to “After ABA treatment” group in **(a)**. All values are the mean ratios of width to length  $\pm$  standard deviations of three independent experiments (n = 60).

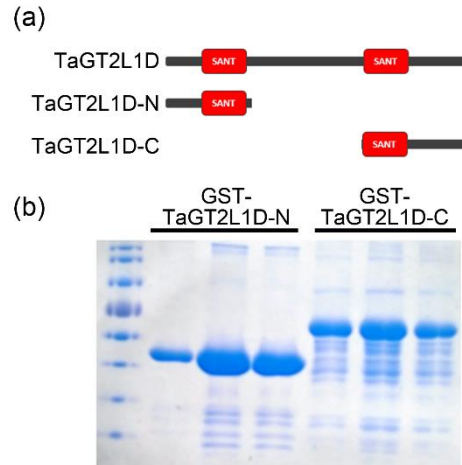

**Supplementary Fig. S5** Expression and purification of GST-TaGT2L1D-N and GST-TaGT2L1D-C proteins. **(a)** Schematic diagrams of TaGT2L1D-N and TaGT2L1D-C proteins. Red boxes indicate SANT domains. **(b)** The purified proteins were separated on a 10% polyacrylamide gel, and Coomassie brilliant blue (CBB) staining was performed to show the purity of GST-TaGT2L1D-N and GST-TaGT2L1D-C proteins.

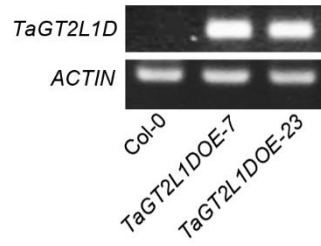

**Supplementary Fig. S6** Expression level of *TaGT2L1D* in the *TaGT2L1DOE* lines.

Total RNA from four-week-old Col-0, *TaGT2L1DOE-7*, and *TaGT2L1DOE-23* plants was isolated and reverse-transcribed (n = 6). RT-PCR was performed using *AtACTIN* as an internal reference.
